# Supplementary material for: Field heterogeneity of soil texture controls leaf water potential spatial distribution predicted from UAS-based vegetation indices in non-irrigated vineyards
Source: Copernicus journal article supplement (doi:10.5194/bg-22-513-2025), 2025-01-29
Supplement: Supplementary file 1 [file bg-22-513-2025-supplement.pdf]

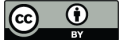

*Supplement of*

## **Field heterogeneity of soil texture controls leaf water potential spatial distribution predicted from UAS-based vegetation indices in non-irrigated vineyards**

**Louis Delval et al.**

*Correspondence to:* Louis Delval ([louis.delval@uclouvain.be](mailto:louis.delval@uclouvain.be)) and Mathieu Javaux ([mathieu.javaux@uclouvain.be](mailto:mathieu.javaux@uclouvain.be))

The copyright of individual parts of the supplement might differ from the article licence.

## Supplementary tables

Table S1 – List of vegetation indices (VIs), spectral bands and structural features used in this study to predict  $\Psi_{\text{leaf}}$ .

| Vegetation index (VI), band or structural feature | Full name                                    | Formula                                                                                                                            |
|---------------------------------------------------|----------------------------------------------|------------------------------------------------------------------------------------------------------------------------------------|
| Red                                               | Red band                                     | -                                                                                                                                  |
| Green                                             | Green band                                   | -                                                                                                                                  |
| Blue                                              | Blue band                                    | -                                                                                                                                  |
| RedEdge                                           | Red-edge band                                | -                                                                                                                                  |
| NIR                                               | Near infrared band                           | -                                                                                                                                  |
| ARI                                               | Anthocyanin Reflectance Index                | $1/\text{green} - 1/\text{rededge}$                                                                                                |
| CI                                                | Chlorophyll Index                            | $(\text{nir}/\text{red})-1$                                                                                                        |
| CIVE                                              | Color Index of Vegetation Extraction         | $0.441*\text{red} - 0.811*\text{green} + 0.385*\text{blue} + 18.78745$                                                             |
| CLGreen                                           | Chlorophyll index green                      | $(\text{nir}/\text{green})-1$                                                                                                      |
| CLRedEdge                                         | Chlorophyll index rededge                    | $(\text{nir}/\text{rededge})-1$                                                                                                    |
| DVI                                               | Difference Vegetation Index                  | $\text{nir}-\text{red}$                                                                                                            |
| EVI                                               | Enhanced Vegetation Index                    | $(2.5*(\text{nir}-\text{red})) / (\text{nir}+6*\text{red}-7.5*\text{blue}+1)$                                                      |
| EVI2                                              | Enhanced Vegetation Index 2                  | $(2.5*(\text{nir}-\text{red})) / (\text{nir}+2.5*\text{red}+1)$                                                                    |
| ExG                                               | Excess Green Vegetation Index                | $2*\text{green}-\text{red}-\text{blue}$                                                                                            |
| ExGR                                              | -                                            | $\text{ExG}-\text{ExR}$                                                                                                            |
| ExR                                               | Excess Red Vegetation Index                  | $(1.4*\text{red}-\text{green}) / (\text{red}+\text{green}+\text{blue})$                                                            |
| GCC                                               | Green chromatic coordinates                  | $\text{Green} / (\text{red}+\text{green}+\text{blue})$                                                                             |
| GNDVI                                             | Green Normalized Difference Vegetation Index | $(\text{nir}-\text{green}) / (\text{nir}+\text{green})$                                                                            |
| GRVI                                              | Green-Red Vegetation Index                   | $(\text{red}-\text{green}) / (\text{red}+\text{green})$                                                                            |
| Green NDVI                                        | Green Normalized Difference Vegetation Index | $(\text{green}-\text{nir}) / (\text{green}+\text{nir})$                                                                            |
| Green Percentage                                  | Green Percentage                             | $\text{Green} / (\text{green}+\text{red}+\text{blue})$                                                                             |
| Green/red                                         | Green/red                                    | $\text{Green}/\text{red}$                                                                                                          |
| MCARI                                             | Modified Chlorophyll Absorption Ratio Index  | $((\text{rededge}-\text{red})-0.2*(\text{rededge}-\text{green})) * (\text{rededge}/\text{rd})$                                     |
| MCARlone                                          | -                                            | $1.2*(2.5*(\text{nir}-\text{red})-1.3*(\text{nir}-\text{green}))$                                                                  |
| MCARItwo                                          | -                                            | $1.5*(2.5(\text{nir}-\text{red})-1.3(\text{nir}-\text{green})) / \sqrt{(2*\text{nir}+1)^2-(6*\text{nir}-5*\sqrt{\text{red}}-0.5)}$ |
| MSAVI                                             | Modified Soil Adjusted Vegetation Index      | $0.5*(2*\text{nir}+1-\sqrt{(2*\text{nir}+1)^2-8(\text{nir}-\text{red})})$                                                          |

|             |                                                      |                                                                                             |
|-------------|------------------------------------------------------|---------------------------------------------------------------------------------------------|
| MSR         | Modified Simple Ratio                                | $\frac{\frac{nir}{red} - 1}{\sqrt{\frac{nir}{red} - 1}}$                                    |
| MTVIone     | Modified Triangular Vegetation Index one             | $1.2*(1.2*(nir-green)-2.5*(red-green))$                                                     |
| MTVItwo     | Modified Triangular Vegetation Index two             | $\frac{1.2*(1.2*(nir-green)-2.5*(red-green))}{\sqrt{(2*nir+1)^2-(6*nir-5*\sqrt{red}-0.5)}}$ |
| NDRE        | Normalized Difference Red Edge                       | $(nir-rededge)/(nir+rededge)$                                                               |
| NDVI        | Normalized Difference Vegetation Index               | $(nir-red)/(nir+red)$                                                                       |
| NGRDI       | Normalized Green-Red Difference Index                | $(green-red)/(green+red)$                                                                   |
| Nir/green   | Nir/green                                            | Nir/green                                                                                   |
| OSAVI       | Optimized Soil-Adjusted Vegetation Index             | $(1.16/(nir-red))*nir+red+0.16$                                                             |
| RDVI        | Renormalized Difference Vegetation Index             | $\frac{nir-red}{\sqrt{nir+red}}$                                                            |
| Red/green   | Red/greed                                            | Red/green                                                                                   |
| SRI         | Simple ratio index                                   | Nir/red                                                                                     |
| SAVI        | Soil-Adjusted Vegetation Index                       | $((nir-red)/(nir+red+0.5))*1.5$                                                             |
| SIPI        | Structure Insensitive Pigment Index                  | $(nir-blue)/(nir+red)$                                                                      |
| TCARI       | Transformed Chlorophyll Absorption Reflectance Index | $3*((rededge-red)-0.2*(rededge-green))*(rededge/green)$                                     |
| TCARI/OSAVI | -                                                    | TCARI/OSAVI                                                                                 |
| VARI        | Visible Atmospherically Resistant Index              | $(green-red)/(green+red-blue)$                                                              |
| CWSIa       | Crop water stress index a                            | $\frac{CST - T_{wet}}{T_{dry} - T_{wet}}$                                                   |
| CWSIb       | Crop water stress index b                            | $\frac{CST - CST_{max}}{CST_{max} - CST_{min}}$                                             |
| dT          | Difference of temperature                            | CST – air temperature                                                                       |
| CST         | Canopy surface temperature                           | -                                                                                           |
| CH          | Canopy height                                        | -                                                                                           |
| LAI         | Leaf area index                                      | -                                                                                           |

Table S2 – Variance Inflation Factor (VIF) to assess the collinearity between the predictor variables in the model 1  $\Psi_{\text{leaf\_pred}} = -1.55 + 0.27 \cdot \text{CLRedEdge} - 0.49 \cdot \text{CWSIb} + 8.40 \cdot \text{Blue} + 0.27 \cdot \text{CH}$  (multispectral, thermal and LiDAR data).

| Predictor variable | CH   | CLRedEdge | CWSIb | Blue |
|--------------------|------|-----------|-------|------|
| VIF                | 1.67 | 1.78      | 1.17  | 1.30 |

Table S3 – Variance Inflation Factor (VIF) to assess the collinearity between the predictor variables in the model 2  $\Psi_{\text{leaf\_pred}} = -0.77 + 0.81 \cdot \text{CLRedEdge} + 6.78 \cdot \text{Blue} + 0.38 \cdot \text{CH} + 1.49 \cdot \text{RedEdge} + 0.02 \cdot \text{ARI} - 3.32 \cdot \text{GNDVI}$  (multispectral and LiDAR data).

| Predictor variable | CH   | RedEdge | ARI  | Blue | CLRedEdge | GNDVI |
|--------------------|------|---------|------|------|-----------|-------|
| VIF                | 1.73 | 2.86    | 3.63 | 3.75 | 4.49      | 4.08  |

Table S4 – Variance Inflation Factor (VIF) to assess the collinearity between the predictor variables in the model 3  $\Psi_{\text{leaf\_pred}} = -0.94 - 0.28 \cdot \text{CWSIb} + 0.38 \cdot \text{CH} - 0.01 \cdot \text{CST}$  (thermal and LiDAR data).

| Predictor variable | CH   | CWSIb | CST  |
|--------------------|------|-------|------|
| VIF                | 1.41 | 2.21  | 2.43 |

Supplementary figures

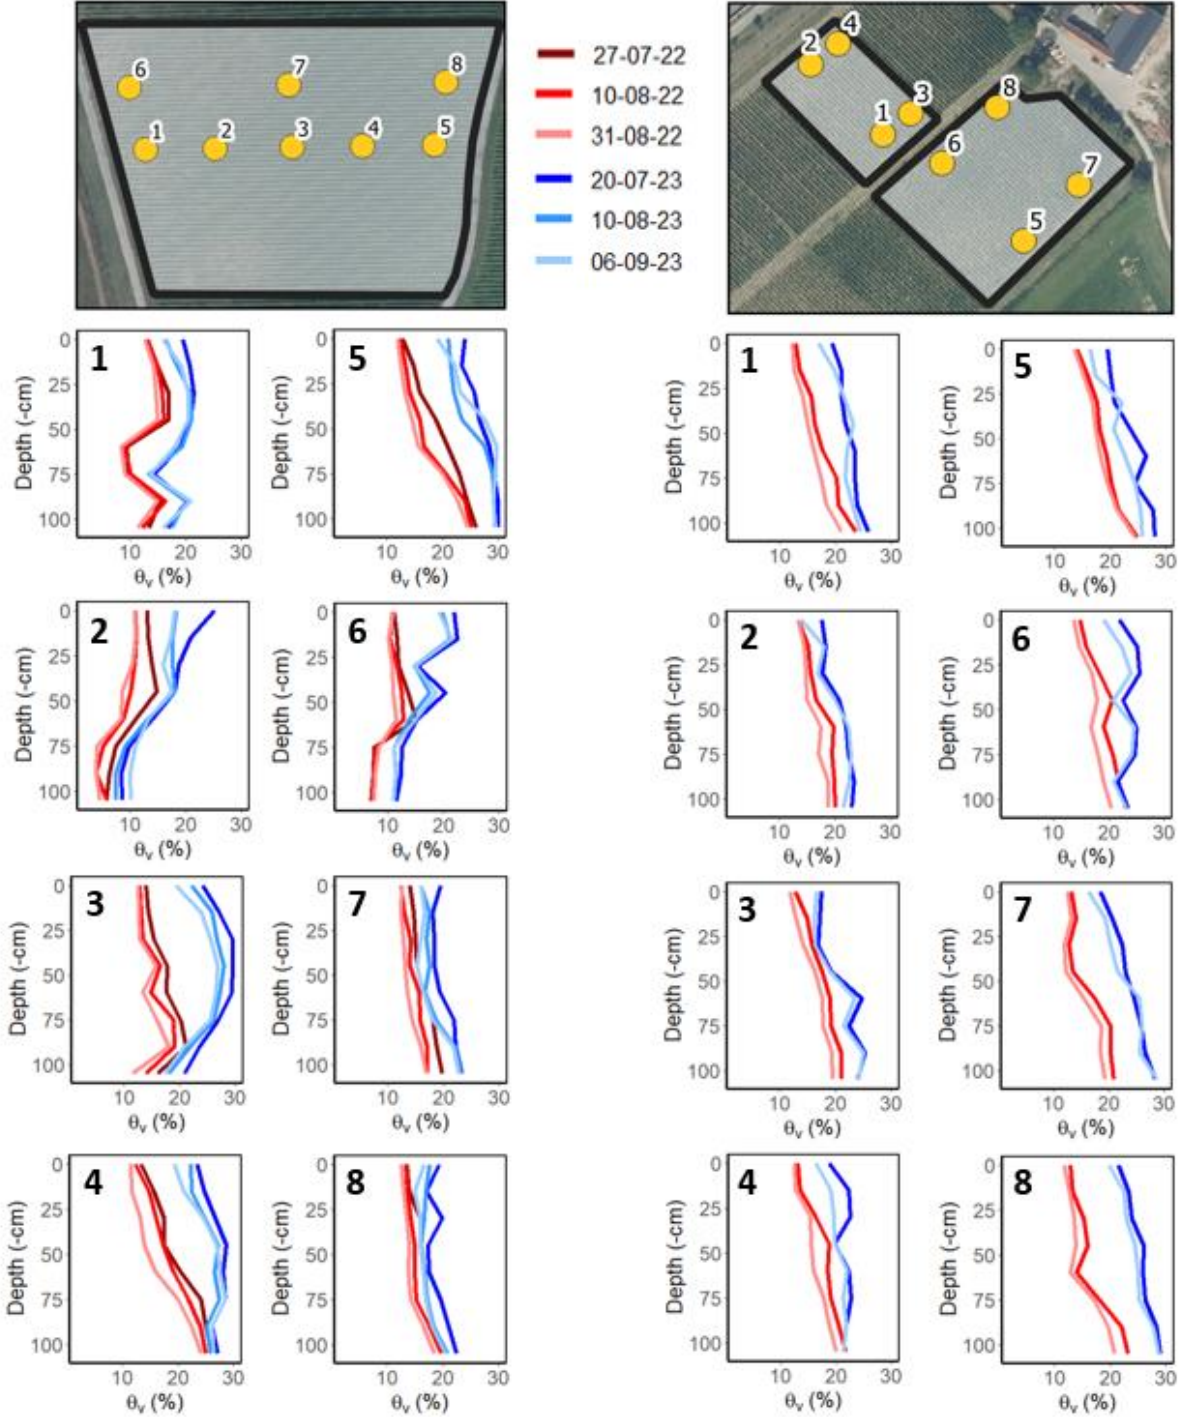

**Figure S1** - Evolution of soil water content ( $\theta_v$ ) profile down to 105 cm depth, measured just before each UAS flight at different locations (yellow points) in both vineyards.

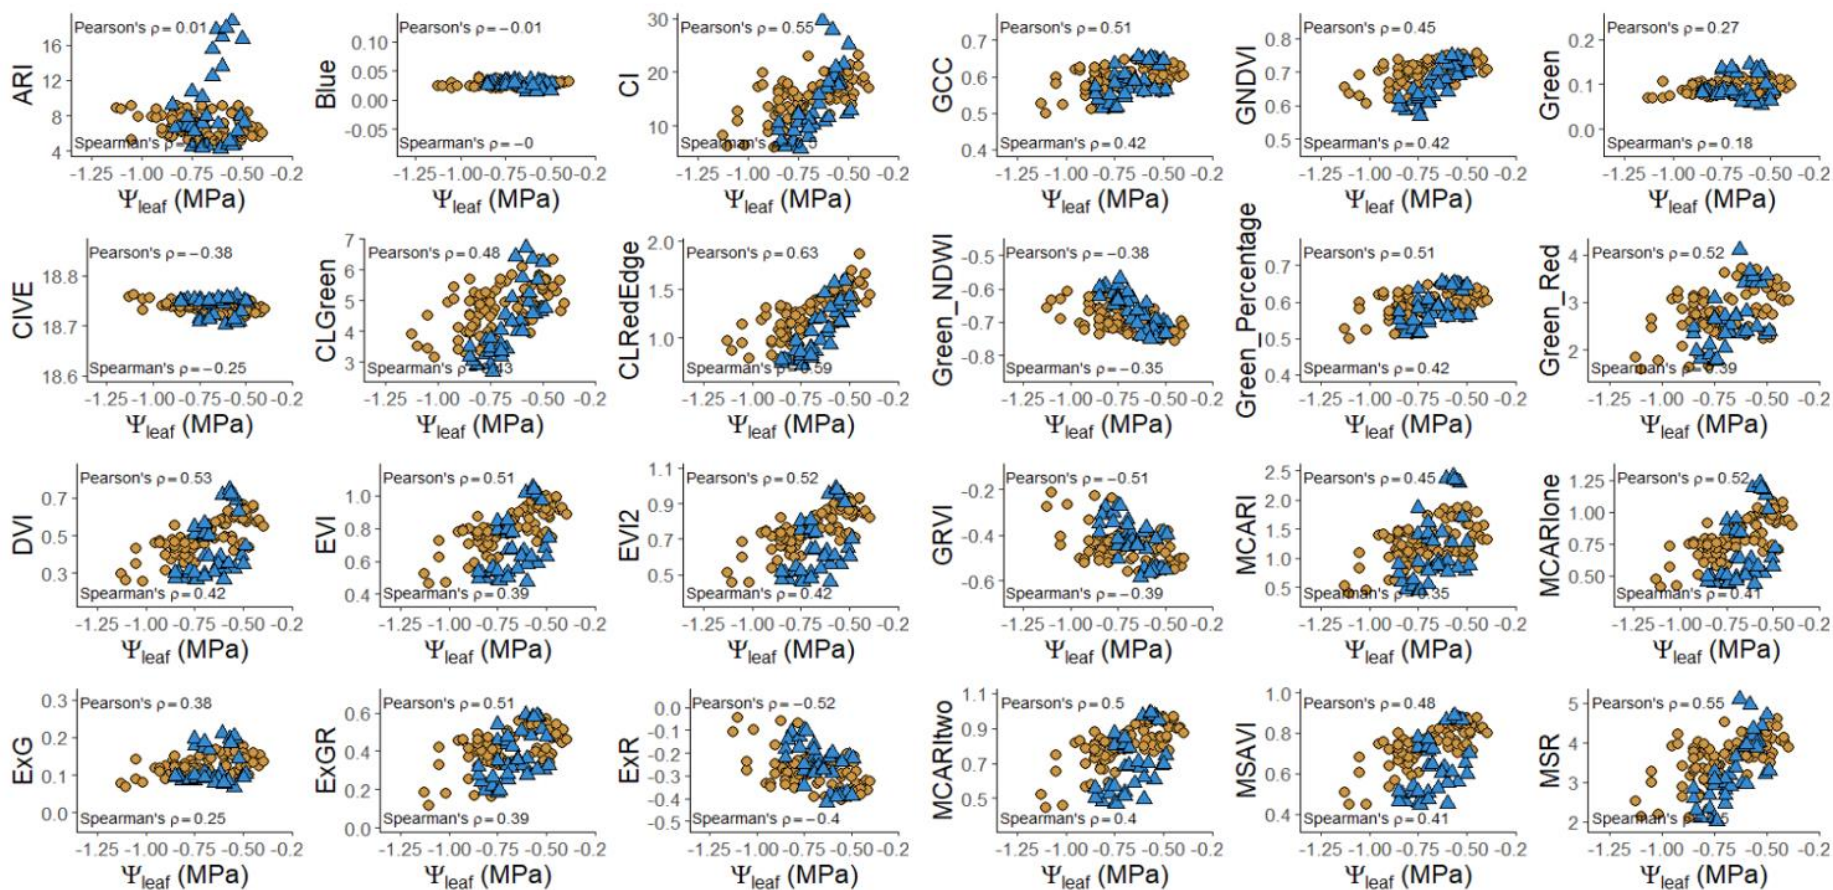

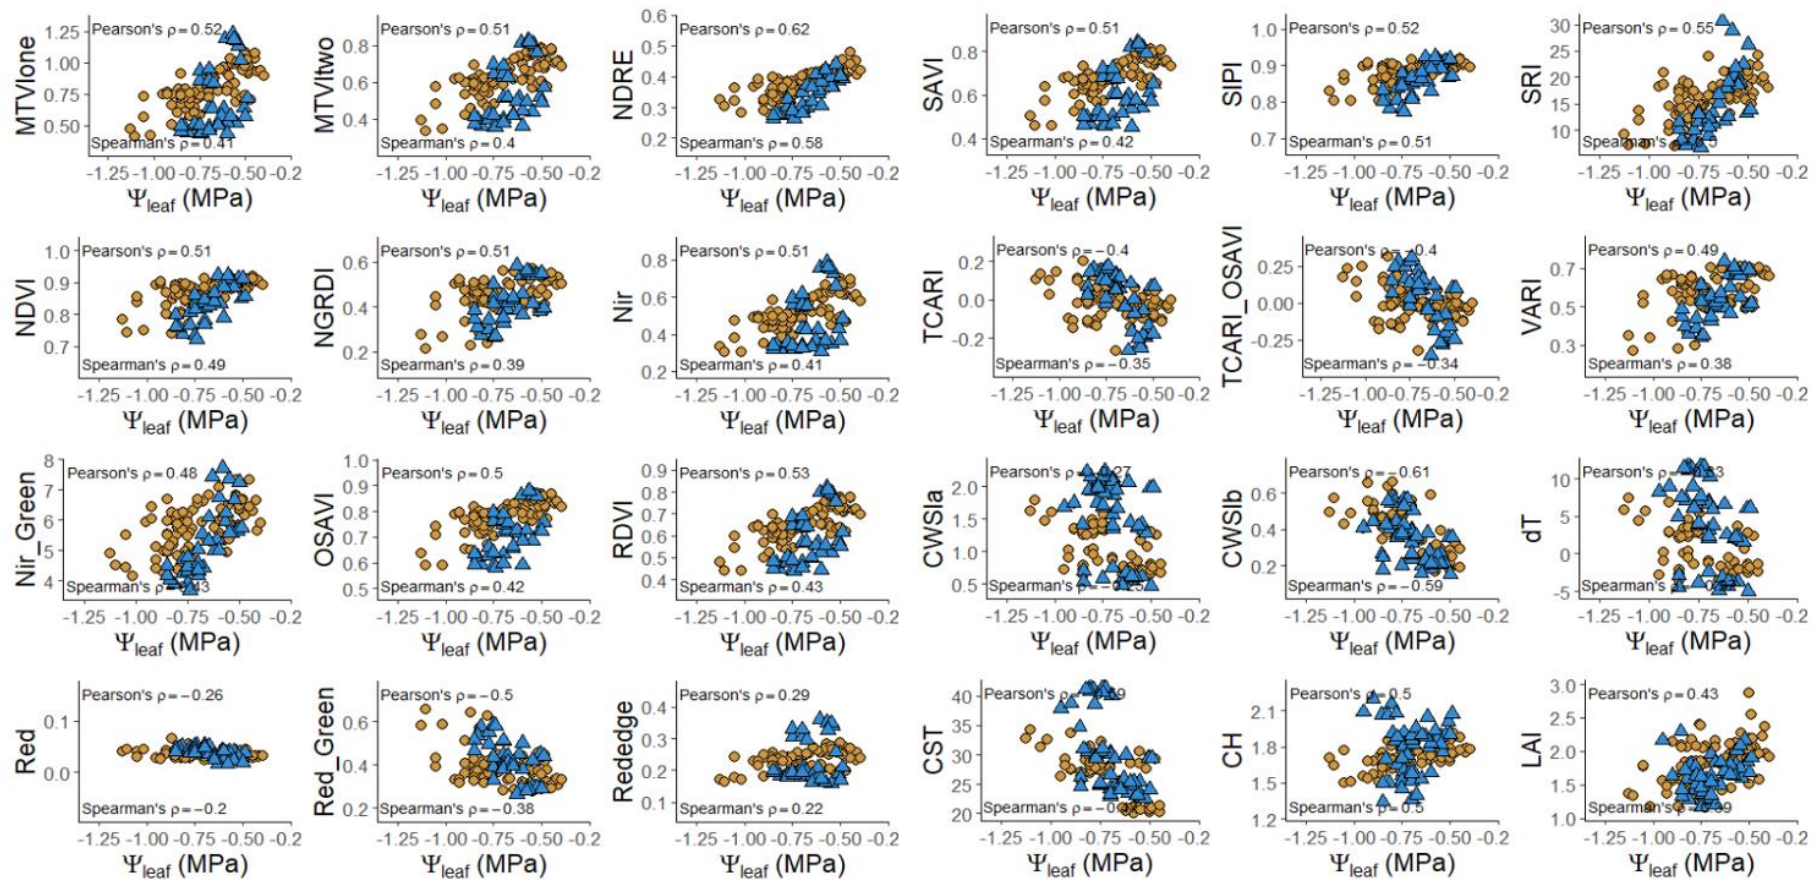

**Figure S2** – Univariable relation between measured  $\Psi_{\text{leaf}}$  and the different VIs. The Pearson's and Spearman's coefficients ( $\rho$ ), on all points together, are shown in the plots. Brown circles correspond to data from *Château de Bousval* vineyard; blue triangles correspond to data from *Domaine W* vineyard.

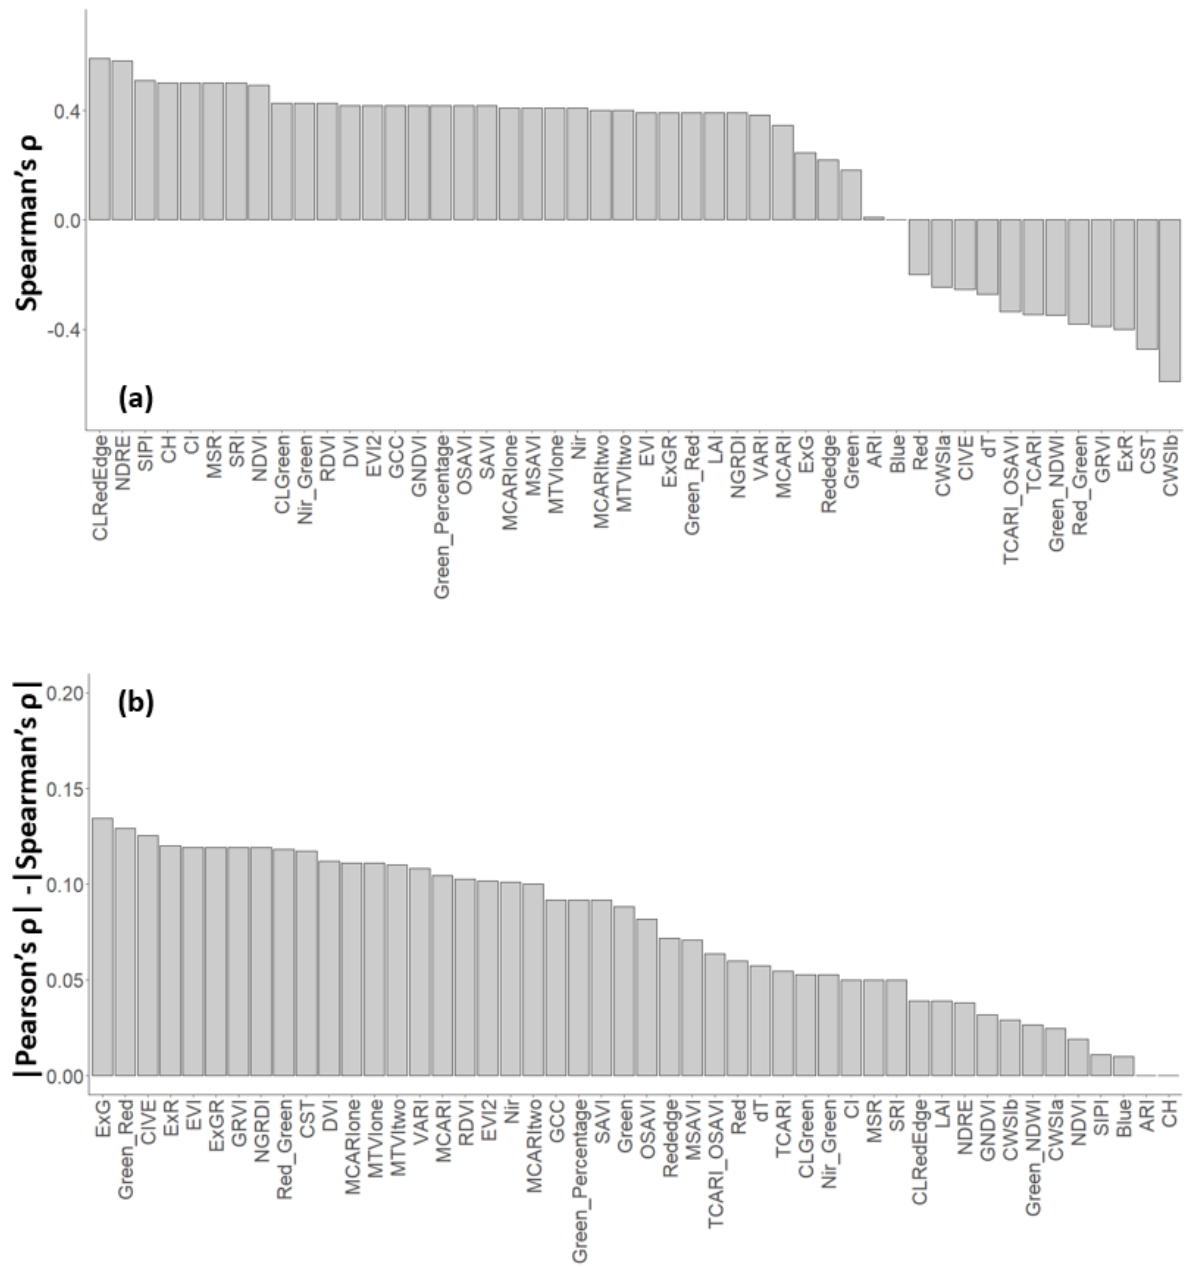

**Figure S3 – (a)** Spearman's coefficient (Spearman's  $\rho$ ) quantifying the non-linear correlation between measured  $\Psi_{leaf}$  and each vegetation index (VI), by taking all the measurements in both vineyards and at all dates. **(b)** Difference between the absolute values of Pearson's  $\rho$  and Spearman's  $\rho$ .



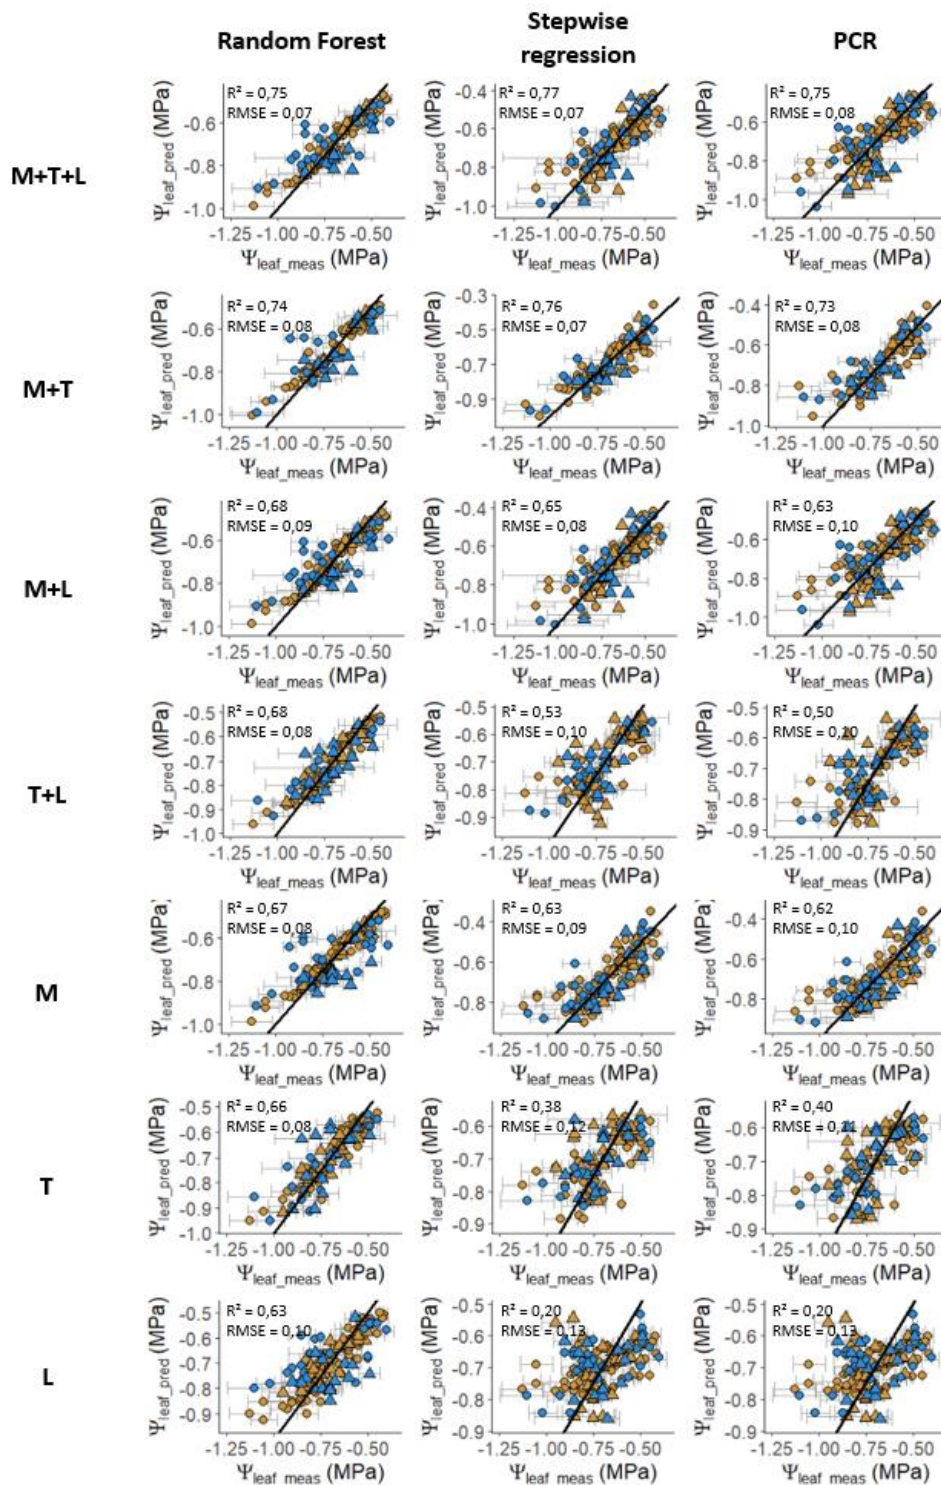

**Figure S4** – Relation between leaf water potential measured ( $\Psi_{\text{leaf\_meas}}$  – x-axis) and predicted ( $\Psi_{\text{leaf\_pred}}$  – y-axis) with random forest model (left column), stepwise regression model (middle column) and principal component regression model (PCR – right column), for the different UAS data combinations of multispectral (M), thermal (T) and LiDAR (L) data. Blue and brown points are respectively data from *Château de Bousval* and *Domaine W* vineyards. Circles and triangles are respectively data used for the calibration and validation of the models. Horizontal grey lines are the standard deviation of measured  $\Psi_{\text{leaf}}$ . The black lines are the 1:1 line.  $R^2$  and RMSE are calculated taking account to all points.

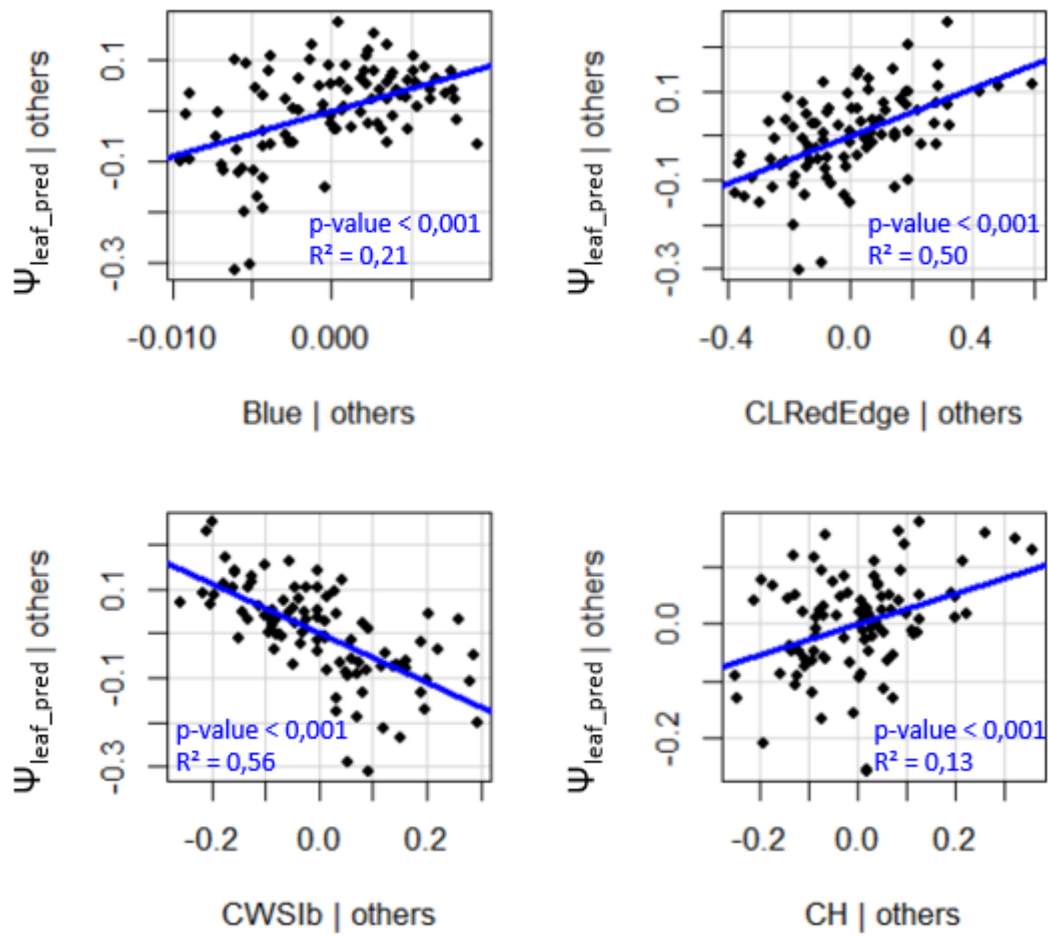

**Figure S5** – Partial regression plots of each predictor variable on the prediction of  $\Psi_{\text{leaf}}$ , for the model 1  $\Psi_{\text{leaf\_pred}} = -1.55 + 0.27 \cdot \text{CLRedEdge} - 0.49 \cdot \text{CWSIb} + 8.40 \cdot \text{Blue} + 0.27 \cdot \text{CH}$  (multispectral, thermal and LiDAR data). The p-value < 0.001 signifies that the slope of the linear regression (blue line) is significantly different from 0.

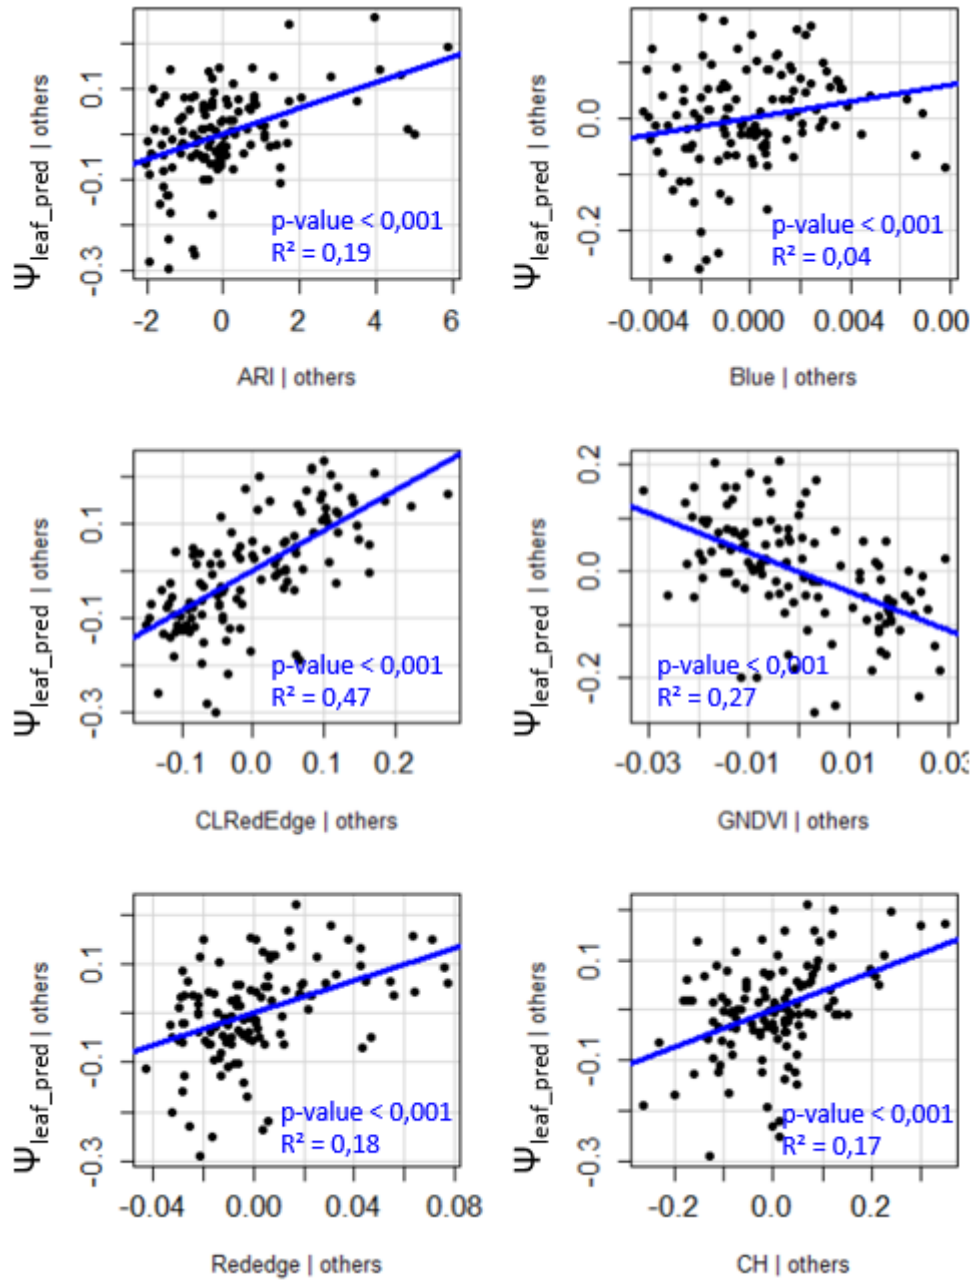

**Figure S6** – Partial regression plots of each predictor variable on the prediction of  $\Psi_{\text{leaf}}$ , for the model  $2 \Psi_{\text{leaf\_pred}} = -0.77 + 0.81 \cdot \text{CLRedEdge} + 6.78 \cdot \text{Blue} + 0.38 \cdot \text{CH} + 1.49 \cdot \text{RedEdge} + 0.02 \cdot \text{ARI} - 3.32 \cdot \text{GNDVI}$  (multispectral and LiDAR data). The  $p\text{-value} < 0.001$  signifies that the slope of the linear regression (blue line) is significantly different from 0.

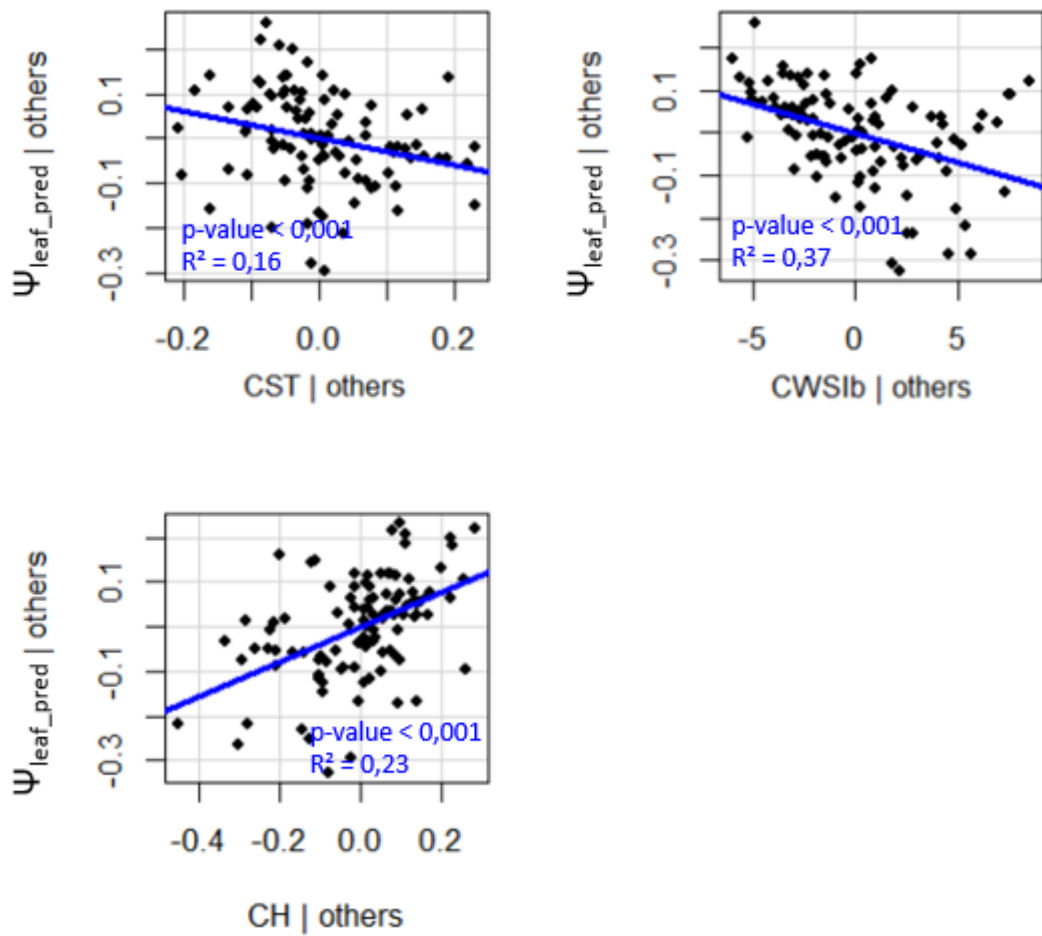

**Figure S7** – Partial regression plots of each predictor variable on the prediction of  $\Psi_{\text{leaf}}$ , for the model  $3 \Psi_{\text{leaf\_pred}} = -0.94 - 0.28 \cdot \text{CWSIb} + 0.38 \cdot \text{CH} - 0.01 \cdot \text{CST}$  (thermal and LiDAR data). The  $p\text{-value} < 0.001$  signifies that the slope of the linear regression (blue line) is significantly different from 0.

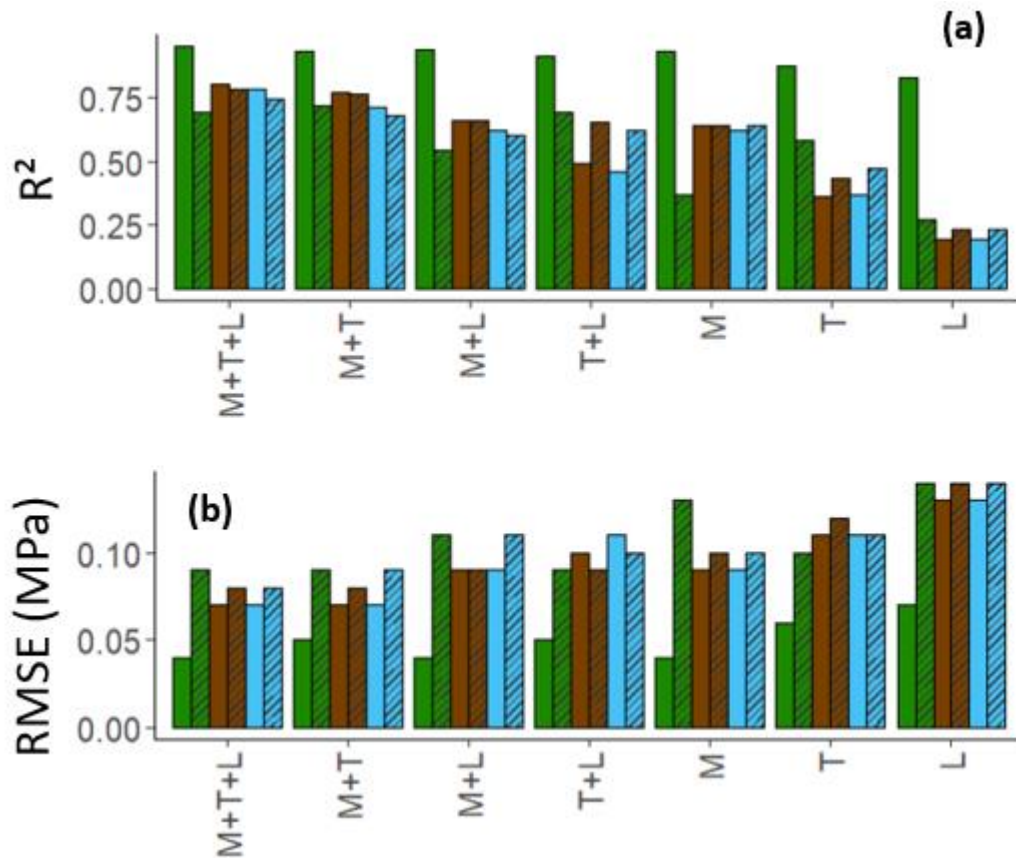

**Figure S8 - (a)  $R^2$  and (b) RMSE** obtained by comparing measured  $\Psi_{\text{leaf}}$  ( $\Psi_{\text{leaf\_meas}}$ ) and predicted  $\Psi_{\text{leaf}}$  ( $\Psi_{\text{leaf\_pred}}$ ) with different multiple linear regression models, for the different data combinations. The green bars correspond to the random forest model, the brown bars to the stepwise regression model, and the blue bars to the principal component regression model. The full bars correspond to the calibration dataset (70 % of the data), while the hatched bars correspond to the validation dataset (30 % of the data).
